# Supplementary material for: New Physicochemical Methodology for the Determination of the Surface Thermodynamic Properties of Solid Particles
Source: MDPI journal article supplement (doi:10.3390/appliedchem3020015), 2023-05-10
Supplement: s1 [file s1]

## Supporting information

### New physicochemical methodology for the determination of the surface thermodynamic properties of solid particles

Tayssir Hamieh<sup>1,2</sup>

<sup>1</sup>Faculty of Science and Engineering, Maastricht University, P.O. Box 616, 6200 MD Maastricht, Netherlands

<sup>2</sup>Laboratory of Materials, Catalysis, Environment and Analytical Methods Laboratory (MCEMA), Faculty of Sciences, Lebanese University, Hadath, Lebanon

Correspondence: Faculty of Science and Engineering, Maastricht University, P.O. Box 616, 6200 MD Maastricht, The Netherlands, E-mail: [t.hamieh@maastrichtuniversity.nl](mailto:t.hamieh@maastrichtuniversity.nl)

**Table S1.** Values (in kJ/mol) of the specific free energy ( $-\Delta G_a^{sp}(T)$ ) of the various polar solvents adsorbed on alumina particles surface for different temperatures by using the various molecular models and IGC methods.

| $\Delta G_a^{sp}$ (T) (in kJ/mol) | Kiselev model |       |        |               |       |         |
|-----------------------------------|---------------|-------|--------|---------------|-------|---------|
| T(K)                              | CCl4          | CHCl3 | CH2Cl2 | Diethyl ether | THF   | Toluene |
| T(K)                              | 5.14          | 34.92 | 15.80  | 42.47         | 32.33 | 10.89   |
| 323.15                            | 4.81          | 33.27 | 15.41  | 40.36         | 30.57 | 9.48    |
| 343.15                            | 4.48          | 31.83 | 15.83  | 38.35         | 28.89 | 8.29    |
| 363.15                            | 4.22          | 30.37 | 13.54  | 36.79         | 27.54 | 7.56    |
| 383.15                            | 3.83          | 29.45 | 11.08  | 34.90         | 25.85 | 6.55    |
| 403.15                            | 3.32          | 25.97 | 7.36   | 31.58         | 24.01 | 5.67    |
| 423.15                            | 3.18          | 23.80 | 5.70   | 30.20         | 23.36 | 4.28    |
| 443.15                            | 3.24          | 21.56 | 3.00   | 27.92         | 22.22 | 3.14    |

| $\Delta G_a^{sp}$ (T) (in kJ/mol) | Spherical model |       |        |               |       |         |
|-----------------------------------|-----------------|-------|--------|---------------|-------|---------|
| T(K)                              | CCl4            | CHCl3 | CH2Cl2 | Diethyl ether | THF   | Toluene |
| 323.15                            | 5.76            | 37.36 | 19.27  | 41.89         | 35.52 | 15.12   |
| 343.15                            | 5.25            | 35.40 | 18.53  | 39.92         | 33.30 | 13.18   |
| 363.15                            | 4.76            | 33.66 | 18.60  | 38.05         | 31.20 | 11.53   |
| 383.15                            | 4.37            | 31.94 | 16.48  | 36.65         | 29.47 | 10.41   |
| 403.15                            | 3.85            | 30.70 | 13.21  | 34.94         | 27.34 | 8.95    |
| 423.15                            | 3.24            | 27.12 | 9.39   | 33.44         | 25.02 | 7.60    |
| 443.15                            | 2.99            | 25.02 | 7.60   | 31.53         | 24.07 | 6.12    |
| 463.15                            | 2.77            | 21.63 | 4.00   | 28.44         | 22.21 | 4.96    |

| $\Delta G_a^{sp}$ (T) (in kJ/mol) | Geometric model |       |        |               |     |         |
|-----------------------------------|-----------------|-------|--------|---------------|-----|---------|
| T(K)                              | CCl4            | CHCl3 | CH2Cl2 | Diethyl ether | THF | Toluene |

|        |       |       |       |       |       |       |
|--------|-------|-------|-------|-------|-------|-------|
| 323.15 | 10.65 | 38.43 | 20.49 | 39.68 | 33.31 | 13.30 |
| 343.15 | 9.92  | 36.10 | 18.40 | 37.92 | 31.48 | 11.84 |
| 363.15 | 9.23  | 33.97 | 16.73 | 36.23 | 29.75 | 10.60 |
| 383.15 | 8.69  | 31.76 | 14.84 | 34.97 | 28.36 | 9.83  |
| 403.15 | 7.85  | 29.79 | 11.85 | 33.45 | 26.62 | 8.66  |
| 423.15 | 6.75  | 26.76 | 8.56  | 32.03 | 24.70 | 7.49  |
| 443.15 | 6.27  | 24.35 | 6.91  | 30.35 | 23.85 | 6.17  |
| 463.15 | 5.40  | 21.61 | 3.62  | 27.72 | 21.93 | 4.43  |

| $\Delta G_a^{sp}$ (T) (in kJ/mol) | Van de Waals (VDW) model |       |        |               |       |         |
|-----------------------------------|--------------------------|-------|--------|---------------|-------|---------|
| T(K)                              | CCl4                     | CHCl3 | CH2Cl2 | Diethyl ether | THF   | Toluene |
| 323.15                            | 5.10                     | 35.58 | 18.23  | 40.52         | 35.03 | 14.37   |
| 343.15                            | 5.29                     | 34.39 | 17.83  | 39.29         | 33.50 | 13.15   |
| 363.15                            | 4.89                     | 32.76 | 17.47  | 37.48         | 31.44 | 11.62   |
| 383.15                            | 4.57                     | 31.11 | 15.21  | 36.13         | 29.75 | 10.61   |
| 403.15                            | 4.11                     | 29.95 | 11.89  | 34.48         | 27.65 | 9.21    |
| 423.15                            | 3.52                     | 26.89 | 8.44   | 32.99         | 25.34 | 7.86    |
| 443.15                            | 3.29                     | 24.05 | 6.91   | 31.07         | 24.37 | 6.41    |
| 463.15                            | 3.10                     | 21.37 | 3.71   | 28.17         | 22.53 | 5.24    |

| $\Delta G_a^{sp}$ (T) (in kJ/mol) | Redlich-Kwong (R-K) model |       |        |               |       |         |
|-----------------------------------|---------------------------|-------|--------|---------------|-------|---------|
| T(K)                              | CCl4                      | CHCl3 | CH2Cl2 | Diethyl ether | THF   | Toluene |
| 323.15                            | 5.73                      | 36.29 | 18.92  | 41.21         | 35.69 | 14.93   |
| 343.15                            | 5.32                      | 34.43 | 17.85  | 39.31         | 33.52 | 13.15   |
| 363.15                            | 4.91                      | 32.79 | 17.49  | 37.50         | 31.46 | 11.61   |
| 383.15                            | 4.59                      | 31.14 | 15.42  | 36.15         | 29.77 | 10.60   |
| 403.15                            | 4.13                      | 29.96 | 12.67  | 34.49         | 27.67 | 9.20    |
| 423.15                            | 3.53                      | 26.60 | 8.88   | 33.00         | 25.36 | 7.86    |
| 443.15                            | 3.23                      | 24.19 | 7.05   | 30.77         | 24.25 | 6.44    |
| 463.15                            | 2.97                      | 21.26 | 3.54   | 27.85         | 22.28 | 5.27    |

| $\Delta G_a^{sp}$ (T) (in kJ/mol) | Cylindrical model |       |        |               |       |         |
|-----------------------------------|-------------------|-------|--------|---------------|-------|---------|
| T(K)                              | CCl4              | CHCl3 | CH2Cl2 | Diethyl ether | THF   | Toluene |
| 323.15                            | 5.78              | 39.62 | 21.30  | 39.67         | 31.00 | 9.14    |
| 343.15                            | 5.42              | 37.16 | 19.35  | 37.95         | 29.40 | 7.91    |
| 363.15                            | 5.07              | 34.91 | 17.92  | 36.33         | 27.88 | 6.89    |
| 383.15                            | 4.80              | 32.61 | 16.82  | 35.15         | 26.66 | 6.29    |
| 403.15                            | 4.37              | 30.58 | 13.44  | 33.71         | 25.15 | 5.43    |
| 423.15                            | 3.79              | 27.11 | 9.27   | 32.48         | 23.50 | 4.73    |
| 443.15                            | 3.18              | 23.21 | 5.96   | 29.02         | 22.41 | 4.21    |
| 463.15                            | 3.08              | 20.89 | 3.02   | 26.87         | 21.10 | 3.09    |

| $\Delta G_a^{sp}$ (T) (in kJ/mol) | Hamieh model |  |  |  |  |  |
|-----------------------------------|--------------|--|--|--|--|--|
|-----------------------------------|--------------|--|--|--|--|--|

| T(K)   | CCl4 | CH2Cl2 | CHCl3 | Diethyl ether | THF   | Toluene |
|--------|------|--------|-------|---------------|-------|---------|
| 323.15 | 6.25 | 27.30  | 19.07 | 41.10         | 35.83 | 7.21    |
| 343.15 | 6.16 | 27.20  | 17.16 | 38.72         | 34.56 | 6.50    |
| 363.15 | 6.04 | 27.00  | 15.20 | 36.22         | 33.11 | 5.56    |
| 383.15 | 5.92 | 26.90  | 13.10 | 34.40         | 32.03 | 5.08    |
| 403.15 | 5.80 | 26.80  | 11.35 | 32.18         | 30.76 | 4.38    |
| 423.15 | 5.68 | 26.60  | 9.33  | 29.96         | 29.50 | 3.67    |
| 443.15 | 5.56 | 26.51  | 7.25  | 27.74         | 28.13 | 2.96    |
| 463.15 | 5.44 | 26.37  | 5.22  | 25.52         | 26.76 | 2.25    |

| $\Delta G_a^{sp}$ (T) (in kJ/mol) | Topological index method |        |       |               |       |         |
|-----------------------------------|--------------------------|--------|-------|---------------|-------|---------|
| T(K)                              | CCl4                     | CH2Cl2 | CHCl3 | Diethyl ether | THF   | Toluene |
| 323.15                            | 13.21                    | 42.10  | 22.94 | 40.41         | 37.51 | 16.80   |
| 343.15                            | 12.72                    | 39.74  | 20.34 | 38.50         | 35.53 | 15.59   |
| 363.15                            | 12.31                    | 37.59  | 17.91 | 36.66         | 33.68 | 14.62   |
| 383.15                            | 12.17                    | 35.42  | 16.07 | 35.20         | 32.28 | 14.25   |
| 403.15                            | 11.74                    | 33.32  | 13.66 | 33.37         | 30.46 | 13.37   |
| 423.15                            | 11.07                    | 30.70  | 10.86 | 31.20         | 28.46 | 12.39   |
| 443.15                            | 11.05                    | 28.88  | 9.75  | 29.83         | 27.56 | 11.64   |
| 463.15                            | 10.56                    | 26.42  | 6.98  | 27.99         | 25.48 | 10.80   |

| $\Delta G_a^{sp}$ (T) (in kJ/mol) | Deformation polarizability method |        |       |               |       |         |
|-----------------------------------|-----------------------------------|--------|-------|---------------|-------|---------|
| T(K)                              | CCl4                              | CH2Cl2 | CHCl3 | Diethyl ether | THF   | Toluene |
| 323.15                            | 14.67                             | 30.37  | 17.97 | 41.98         | 40.62 | 16.74   |
| 343.15                            | 14.10                             | 28.70  | 15.66 | 39.98         | 38.45 | 15.52   |
| 363.15                            | 13.61                             | 27.16  | 13.49 | 38.05         | 36.44 | 14.56   |
| 383.15                            | 13.43                             | 25.37  | 11.81 | 36.55         | 34.94 | 14.19   |
| 403.15                            | 12.91                             | 23.90  | 9.67  | 34.63         | 32.95 | 13.32   |
| 423.15                            | 12.15                             | 22.08  | 7.21  | 32.35         | 30.74 | 12.34   |
| 443.15                            | 12.09                             | 20.48  | 6.20  | 30.96         | 29.78 | 11.60   |
| 463.15                            | 11.51                             | 18.78  | 3.75  | 29.01         | 27.50 | 10.76   |

| $\Delta G_a^{sp}$ (T) (in kJ/mol) | Vapor pressure method |        |       |               |       |         |
|-----------------------------------|-----------------------|--------|-------|---------------|-------|---------|
| T(K)                              | CCl4                  | CH2Cl2 | CHCl3 | Diethyl ether | THF   | Toluene |
| 323.15                            | 4.97                  | 33.95  | 14.53 | 39.89         | 33.87 | 13.00   |
| 343.15                            | 4.98                  | 32.19  | 12.43 | 38.10         | 32.01 | 11.96   |
| 363.15                            | 5.00                  | 30.58  | 10.45 | 36.37         | 30.26 | 11.16   |
| 383.15                            | 5.01                  | 28.79  | 8.88  | 35.01         | 28.90 | 10.89   |
| 403.15                            | 5.02                  | 27.22  | 6.94  | 33.28         | 27.20 | 10.20   |
| 423.15                            | 5.04                  | 25.23  | 4.71  | 31.19         | 25.40 | 9.47    |
| 443.15                            | 5.05                  | 23.66  | 3.78  | 29.90         | 24.51 | 8.79    |
| 463.15                            | 5.06                  | 21.78  | 1.55  | 28.12         | 22.64 | 8.20    |

| $\Delta G_a^{sp}$ (T) (in kJ/mol) | Boiling point method |        |       |               |       |         |
|-----------------------------------|----------------------|--------|-------|---------------|-------|---------|
| T(K)                              | CCl4                 | CH2Cl2 | CHCl3 | Diethyl ether | THF   | Toluene |
| 323.15                            | 4.76                 | 34.05  | 13.51 | 39.96         | 33.81 | 12.72   |
| 343.15                            | 4.78                 | 32.17  | 11.47 | 38.09         | 32.05 | 11.74   |
| 363.15                            | 4.81                 | 30.45  | 9.54  | 36.28         | 30.40 | 10.99   |
| 383.15                            | 4.95                 | 28.55  | 8.00  | 34.84         | 29.12 | 10.74   |
| 403.15                            | 4.97                 | 26.89  | 6.11  | 33.04         | 27.50 | 10.09   |
| 423.15                            | 4.88                 | 24.82  | 3.95  | 30.90         | 25.76 | 9.38    |
| 443.15                            | 5.03                 | 23.16  | 3.03  | 29.55         | 24.93 | 8.72    |
| 463.15                            | 5.08                 | 21.22  | 0.87  | 27.74         | 23.10 | 8.14    |

| $\Delta G_a^{sp}$ (T) (in kJ/mol) | Method of enthalpy of vaporization ( $\Delta H_{vap}(298K)$ ) |        |       |               |       |         |
|-----------------------------------|---------------------------------------------------------------|--------|-------|---------------|-------|---------|
| T(K)                              | CCl4                                                          | CH2Cl2 | CHCl3 | Diethyl ether | THF   | Toluene |
| 323.15                            | 5.231835                                                      | 31.53  | 14.10 | 39.21         | 33.22 | 13.43   |
| 343.15                            | 5.249835                                                      | 29.79  | 12.02 | 37.37         | 31.49 | 12.41   |
| 363.15                            | 5.267835                                                      | 28.20  | 10.06 | 35.60         | 29.87 | 11.62   |
| 383.15                            | 5.285835                                                      | 26.37  | 8.49  | 34.18         | 28.60 | 11.36   |
| 403.15                            | 5.303835                                                      | 24.84  | 6.57  | 32.41         | 27.01 | 10.66   |
| 423.15                            | 5.321835                                                      | 22.94  | 4.36  | 30.32         | 25.31 | 9.91    |
| 443.15                            | 5.36                                                          | 21.32  | 3.43  | 28.98         | 24.49 | 9.23    |
| 463.15                            | 5.38                                                          | 19.54  | 1.23  | 27.21         | 22.69 | 8.61    |

| $\Delta G_a^{sp}$ (T) (in kJ/mol) | Method of thermic enthalpy of vaporization $\Delta H_{vap}(T)$ |        |       |               |       |         |
|-----------------------------------|----------------------------------------------------------------|--------|-------|---------------|-------|---------|
| T(K)                              | CCl4                                                           | CH2Cl2 | CHCl3 | Diethyl ether | THF   | Toluene |
| 323.15                            | 4.33                                                           | 31.53  | 13.25 | 38.41         | 32.46 | 13.43   |
| 343.15                            | 4.03                                                           | 29.41  | 10.26 | 35.61         | 29.92 | 12.20   |
| 363.15                            | 3.46                                                           | 27.49  | 7.52  | 33.02         | 27.61 | 11.22   |
| 383.15                            | 3.01                                                           | 25.35  | 5.20  | 30.84         | 25.67 | 10.72   |
| 403.15                            | 2.77                                                           | 23.65  | 2.92  | 28.62         | 23.78 | 10.08   |
| 423.15                            | 2.43                                                           | 21.61  | 0.43  | 26.23         | 21.82 | 9.25    |
| 443.15                            | 2.13                                                           | 19.80  | -0.90 | 24.44         | 20.65 | 8.50    |
| 463.15                            | 1.82                                                           | 18.10  | -2.94 | 22.77         | 19.03 | 8.06    |
